1 **Title: Cell-type and region-specific nucleus accumbens AMPAR plasticity associated**  
2 **with morphine reward, reinstatement, and spontaneous withdrawal**

3  
4 **Authors**

5 Aric C. Madayag<sup>1</sup>, Devan Gomez<sup>1</sup>, Eden M. Anderson<sup>1</sup>, Anna E. Ingebretson<sup>2</sup>, Mark J.  
6 Thomas<sup>2</sup>, Matthew Hearing<sup>1</sup>

7 <sup>1</sup>Department of Biomedical Sciences, Marquette University, Milwaukee, WI, 53233

8 <sup>2</sup>Department of Neuroscience, University of Minnesota, Minneapolis, MN 55455

9

10 **Corresponding Author**

11 Name: Matthew C. Hearing, PhD

12 Email: matthew.hearing@marquette.edu

13 Phone: 414-288-5291

14

15 **Conflict of Interest:** No conflicts of interest to disclose

16

17 **Acknowledgements:** The behavioral work done in part with the support by the Mouse Behavior  
18 Core at the University of Minnesota, which received funding from the National Institute for  
19 Neurological Disorders and Stroke (P30 NS062158). These studies were further supported by  
20 funding from the National Institute on Drug Abuse grant K99 DA038706 (to M.H.), R00DA038706  
21 (M.H.), R00DA038706-04S1 (A.C.M), R01DA019666 (M.J.T.), K02DA035459 (M.J.T.) and T32  
22 DA007234 (A.E.I.).

23

24 **Orcid**

25 Aric C. Madayag: 0000-0002-3715-8499

26

27 **Compliance with Ethical Standards**

28 The authors have no conflicts of interest to disclose. All authors have given their consent for  
29 manuscript submission. The research in the current study used mice single- or group-housed on  
30 a 12 h light/dark cycle with food and water available ad libitum with experiments run during the  
31 light portion. All experiments were approved by the University of Minnesota and Marquette  
32 University Institutional Animal Care and Use Committee. The following funding sources made  
33 the study possible: National Institute for Neurological Disorders and Stroke (P30 NS062158);  
34 National Institute on Drug Abuse grant K99 DA038706 (to M.H.), R00DA038706 (M.H.),  
35 R00DA038706-04S1 (A.C.M), R01DA019666 (M.J.T.), K02DA035459 (M.J.T.) and T32  
36 DA007234 (A.E.I.).

37 **ABSTRACT**

38 Despite evidence that morphine-related pathologies reflect adaptations in NAc glutamate  
39 signaling, substantial gaps in basic information remain. The current study examines the impact of  
40 non-contingent acute, repeated, and withdrawal-inducing morphine dosing regimens on  
41 glutamate transmission in D1- or D2-MSNs in the NAcSh and NAcC sub-regions in hopes of  
42 identifying excitatory plasticity that may contribute to differing facets of opioid addiction-related  
43 behavior. Three hours following an acute morphine injection (10 mg/kg), average miniature  
44 excitatory postsynaptic current (mEPSC) amplitude mediated by AMPA-type glutamate receptors  
45 was increased at D1-MSNs in the both the shell and core regions, whereas only the frequency of  
46 events was elevated at D2-MSNs in the shell. In contrast, somatic withdrawal induced by  
47 escalating dose of repeated morphine twice per day (20, 40, 60, 80, 100mg/kg) only enhanced  
48 mEPSC frequency at D2-MSNs in the shell 24 hrs following the final drug exposure. Further, drug  
49 re-exposure 10-14 days following a preference-inducing regimen of morphine produced a rapid  
50 and enduring endocytosis of GluA2-containing AMPARs at D1-MSNs in the shell, that when  
51 blocked by an intra-NAc shell infusion of the Tat-GluA2<sub>3Y</sub> peptide, increased reinstatement of  
52 morphine place preference – a phenomenon distinctly different than effects previously found with  
53 cocaine. The present study is the first to directly identify unique circuit specific adaptations in NAc  
54 glutamate synaptic transmission associated with morphine-related acute reward and somatic  
55 withdrawal as well as post-abstinence short-term plasticity. While differing classes of abused  
56 drugs (i.e., psychostimulants and opioids) produce seemingly similar bidirectional plasticity in the  
57 NAc following exposure to relapse-linked stimuli, our findings indicate this plasticity has distinct  
58 behavioral consequences.

59

## 60 INTRODUCTION

61 Opioids are the main class of drugs for pain management despite the risk for abuse (Wise 1989).  
62 In addition to their primary rewarding effects, repeated use of opioids can result in the  
63 development of physical dependence that manifests as debilitating somatic and psychological  
64 withdrawal symptoms that can perpetuate continued use (Koob et al. 1989; van Ree et al. 1999).  
65 Increasing evidence suggests that opioid-induced plasticity related to tolerance, dependence, and  
66 withdrawal occurs within divergent, as well as overlapping, neural circuits as plasticity responsible  
67 for establishing opioid-seeking behavior and drug-associated stimuli that can provoke craving and  
68 relapse (Badiani et al. 2011; Graziane et al. 2016; Hearing 2019; Hearing et al. 2018; Hearing et  
69 al. 2016; Russell et al. 2016; Zhu et al. 2016) - highlighting a major challenge towards identifying  
70 the neurophysiological bases of dependence and withdrawal versus adaptations responsible for  
71 enduring relapse risk.

72 Prior findings posit glutamate plasticity in the nucleus accumbens (NAc) as a significant factor  
73 in the acute rewarding effects of opioids (Baharlouei et al. 2015), conditioned opioid-associations  
74 (Fujio et al. 2005; Hearing et al. 2016; Siahposht-Khachaki et al. 2017), and relapse vulnerability  
75 (Bossert et al. 2005; Bossert et al. 2006; Shen et al. 2011; Shen et al. 2014). Data also indicate  
76 that elevations in NAc glutamate transmission underlie somatic and affective withdrawal  
77 symptoms (Russell et al. 2016; Sepulveda et al. 2004; Zhu et al. 2016). However, the NAc is a  
78 heterogeneous area of the brain divided into NAc core (NAcC) and shell (NAcSh) subregions  
79 based on anatomical connectivity. While the NAcC subregion interacts with brain regions  
80 associated with motor circuitry, thus coordinating behavioral output, the NAcSh interacts with  
81 limbic and autonomic brain regions, indicating significant regulation of reward, emotional, and  
82 visceral responses to stimuli (Everitt et al. 1999; Heimer et al. 1991; Zahm and Brog 1992). Within  
83 each subregion, the primary target of excitatory glutamate afferents are the principal medium  
84 spiny projection neurons (MSNs), which are categorically divided based on expression of type 1  
85 (D1-MSNs) or type 2 dopamine receptors (D2-MSNs) (Le Moine and Bloch 1995; Lobo and  
86 Kennedy 2006; Smith et al. 2013).

87 Despite evidence that morphine-related pathologies reflect adaptations in NAc glutamate  
88 signaling, substantial gaps in basic information remain. For example, while acute morphine  
89 exposure transiently increases extracellular glutamate in the NAc (Desole et al. 1996; Enrico et  
90 al. 1998; Sepulveda et al. 2004), evidence supporting a role of AMPAR plasticity is lacking.  
91 Further, while elevations in NAc shell GluA1-containing AMPA-type receptors has recently been  
92 shown to causally contribute to morphine dependence increases expression of GluA1-containing  
93 AMPA-type receptors (Russell et al. 2016), it remains unclear whether similar changes occur

94 during spontaneous withdrawal, and in what cell-type these adaptations occur. Increasing  
95 evidence indicates the nature and locus of opioid-induced glutamate plasticity in the NAc dictates  
96 the relationship to behavior, with most findings to date highlighting adaptations to the NAcSh in  
97 opioid reward and aversion (Gracy et al. 2001; Graziane et al. 2016; Hearing et al. 2016; Russell  
98 et al. 2016; Svingos et al. 1997; Zhu et al. 2016). For example, abstinence from non-contingent  
99 morphine administration is associated with divergent plasticity in the NAcSh at D1- and D2-MSNs  
100 (Graziane et al. 2016; Hearing et al. 2016), but not in the NAcC (Hearing et al. 2016), with  
101 increased transmission at D1- and D2-MSNs contributing to opioid reward and aversion learning,  
102 respectively (Graziane et al. 2016; Hearing et al. 2016; Russell et al. 2016; Zhu et al. 2016). The  
103 current study examines the impact of non-contingent acute, repeated, and withdrawal-inducing  
104 morphine dosing regimens on glutamate transmission in D1- or D2-MSNs in the NAcSh and NAcC  
105 sub-regions in hopes of identifying excitatory plasticity that may contribute to differing facets of  
106 opioid addiction-related behavior.

107

## 108 **Materials and Methods**

109 *Animals.* Adult (P49-72) male mice were a combination of heterozygous bacterial artificial  
110 chromosome (BAC) transgenic mice (Jackson Laboratories, Bar Harbor, ME, USA) expressing  
111 tdtomato or eGFP expression driven by either dopamine receptor DR1 (*drd1a*-tdtomato) or DR2  
112 (*drd2*-eGFP), or double transgenics expressing tdtomato and eGFP. Mice were single- or group-  
113 housed on a 12 hrs light/dark cycle with food and water available ad libitum with experiments run  
114 during the light portion. All experiments were approved by the University of Minnesota and  
115 Marquette University Institutional Animal Care and Use Committees.

116

117 *Stereotaxic intra-cranial cannula implantation.* For surgical procedures, mice were anesthetized  
118 with ketamine and xylazine (100/10 mg/kg, respectively, i.p.). Depth of anesthesia was assessed  
119 prior to the subject being placed in the stereotaxic frame (Kopf Instruments, Tujunga, CA, USA).  
120 Measurements targeting implantation of the single barrel guide cannula (26ga, 5mm pedestal,  
121 3.5mm projection; C315GS-5/SP, Plastics1, Roanoke, VA, USA) to the NAcSh region were taken  
122 with respect to bregma/midline (+1.50 a/p, +/- 1.45 m/l, -4.0) at a 14° angle. Cannula were  
123 cemented in place using Geristore (DenMat, Lompoc, CA, USA). Mice were allowed a minimum  
124 5-day recovery period before beginning behavior testing.

125

126 *Morphine-induced Locomotion.* Locomotor chamber apparatus was placed under AnyMaze video  
127 tracking system (Stoelting, Wood Dale, IL, USA) and measurements were made automatically by  
128 the software as previously described (Hearing et al. 2016).

129

130 *Acute Morphine.* Mice were given an injection (i.p.) of saline or morphine (10 mg/kg) and  
131 euthanized 3-4 hrs following injection for electrophysiological recordings. This time point was  
132 chosen for the purpose of performing the electrophysiological recordings while morphine was still  
133 present in tissue and serum. Our recordings were performed prior to reaching the approximate 5-  
134 hour half-life of subcutaneous morphine administration (Hippis et al. 1976) and during a post-  
135 injection time point previously shown to observe elevated locomotor activity (Hearing et al. 2016).  
136 These experiments were performed at the University of Minnesota.

137

138 *Morphine Challenge.* Mice were administered 5 daily injections of saline or morphine (10 mg/kg)  
139 – a regimen previously shown to augment glutamate transmission and promote sensitization  
140 (Hearing et al. 2016) – followed by 10-14 days of abstinence. Mice were then administered a  
141 saline or morphine (10 mg/kg) challenge injection. 16-24 hrs following challenge injection, mice  
142 were euthanized for subsequent electrophysiological recordings. These experiments were  
143 performed at both the University of Minnesota and Marquette University.

144

145 *Spontaneous Withdrawal.* Across a period of 5 days, 2 injections (saline or morphine) were given  
146 each day in their home cage approximately 12 hrs apart, with doses for each day at 20, 40, 60,  
147 80, and 100 mg/kg (10 injections total). Twenty-four hours or 14 days following the final injection,  
148 mice were placed into a clear plastic cage (16.5"x8"x7.5") and examined for signs of somatic  
149 withdrawal during a 30 min period. Somatic measures were chosen based on previous works  
150 examining morphine withdrawal (Cruz et al. 2008; Papaleo and Contarino 2006; Schulteis et al.  
151 1994; van der Laan and de Groot 1988; van der Laan et al. 1991). Jumps, tremors, paw flutters,  
152 wet dog shakes, piloerection, and grooming were hand scored with each measurement recorded  
153 as a score of one, including the singular possible observation of piloerection, to generate a global  
154 withdrawal score with the following equation:  $\frac{jumps}{3} + tremors + grooming + paw\ flutters +$   
155  $shakes + pilerection$  (Papaleo and Contarino 2006). Additional measurements included  
156 locomotor activity in the form of distance traveled (meters, m) using AnyMaze video tracking  
157 software (Stoelting Company, Wood Dale, IL, USA). These experiments were performed at  
158 Marquette University.

159

160 *Conditioned Place Preference.* All conditioned place preference experiments employed a two-  
161 chamber apparatus (St. Albans, VT, USA) and were performed as previously described (Wydeven  
162 et al. 2014). For conditioning, subjects were injected with morphine (5 mg/kg) or vehicle, and after  
163 a 20-min delay were confined for 30 min in the corresponding CS+/CS- chamber. Morphine  
164 dosing for place preference training was chosen based on previous findings that this dose  
165 produces robust place preference (Hearing et al., 2016). Further, this dose in addition to  
166 extinction training following conditioning was shown to produce identical cell-specific plasticity  
167 observed following 5 daily injections of morphine and home cage abstinence (Hearing et al.  
168 2016). A total of four morphine (5 mg/kg) and four saline trials were performed in alternating  
169 fashion, with only one trial performed per day and preference evaluated 24 hrs following the final  
170 conditioning session. Following conditioning, mice underwent 6 daily extinction sessions as  
171 previously described (Hearing et al. 2016), with animals confined to the CS+ and CS-  
172 compartment for 20 min each on days 1, 3, and 5 (extinction training) and allowed to freely explore  
173 on days 2, 4, and 6 (extinction testing). Day 6 data was used for two-way ANOVA analysis.

174  
175 *Intra-cranial GluA2 peptide and reinstatement of place preference.* Experimental treatments for  
176 the reinstatement tests were assigned after extinction training and assignments were made to  
177 ensure that each treatment group had similar preference scores prior to and following extinction.  
178 Reinstatement of place preference was performed in five different experiments. To block  
179 endocytosis of GluA2-containing AMPA receptors in the NAcSh, a synthetic interference peptide  
180 designed to disrupt activity-dependent endocytosis without altering basal receptor trafficking, was  
181 used as previously described (Ahmadian et al. 2004; Brebner et al. 2005). Mice received an intra-  
182 NAcSh infusion of the active (Tat-GluA2<sub>3Y</sub>) or inactive version (Tat-GluA2<sub>3A</sub>) of the peptide diluted  
183 in ACSF (75 pmol; 0.5  $\mu$ L/hemisphere; 0.1  $\mu$ L/min) using a 32ga internal cannula with 1.2 mm  
184 projection beyond the guide. Following infusions, mice were returned to their home cage for 60  
185 min, at which point they received an i.p. injection of morphine (5 mg/kg) or saline, followed by  
186 examination of preference behavior during a 20 min test. Electrophysiology recordings to confirm  
187 effects of Tat-peptide expression were done within 2 hrs following testing. These experiments  
188 were performed at the University of Minnesota.

189  
190 *Histological Analysis.* Histological examination of cannula targeting was done visually on the  
191 electrophysiology rig or post-mortem in tissue fixed with transcardial perfusion of 4%  
192 paraformaldehyde buffered in saline using an overdose of pentobarbital (650 mg/kg). Brains were  
193 cryoprotected, sliced at 40 $\mu$ m, mounted, and cover-slipped with ProLong gold antifade mounting



194 medium (Life Technologies, Eugene, OR, USA). Two mice were excluded from data analysis due  
195 to considerable tissue damage.

196

197 *Electrophysiology.* Sagittal (250  $\mu\text{m}$ ) sections of the NAcSh and NAcC were used for morphine  
198 challenge studies and acute morphine, with coronal slices (300  $\mu\text{m}$ ) used in morphine challenge  
199 and withdrawal studies as previously described (Hearing et al. 2016). Slices were collected in in  
200 a high sucrose solution as previously described (Hearing et al. 2013) and allowed to recover for  
201 at least 45-60 min in ACSF solution saturated with 95%  $\text{O}_2$ /5%  $\text{CO}_2$  containing (in mM) 119 NaCl,  
202 2.5 KCl, 1.0  $\text{NaH}_2\text{PO}_4$ , 1.3  $\text{MgSO}_4$ , 2.5  $\text{CaCl}_2$ , 26.2  $\text{NaHCO}_3$  and 11 glucose. Electrophysiological  
203 recordings assessing miniature excitatory postsynaptic currents (mEPSCs) were performed in the  
204 presence of picrotoxin (100 $\mu\text{M}$ ) and lidocaine (700 $\mu\text{M}$ ) to block GABAergic neurotransmission  
205 and sodium-dependent action potentials, respectively, as previously described (Hearing et al.  
206 2016; Jedynek et al. 2016). The majority of NAcSh recordings were from the medial portion with  
207 an equal blend along the rostro-caudal axis. Cells were visualized using infrared-differential  
208 contrast (IR-DIC) microscopy, and medium spiny neurons (MSNs) were identified by cell subtype-  
209 specific fluorophore (tdTomato or EGFP) in combination with capacitance (>50 pF). Using a Sutter  
210 Integrated Patch Amplifier (Sutter Instruments, Novato, CA, USA) and/or Axon Instruments  
211 Multiclamp 700B (Molecular Devices, Sunnyvale, CA, USA), MSNs were voltage-clamped at -72  
212 mV using electrodes (2.5 - 4  $\text{M}\Omega$ ) with a cesium-methyl sulfonate based internal solution  
213 containing (in mM) 120 CsMeSO<sub>4</sub>, 15 CsCl, 10 TEA-Cl, 8 NaCl, 10 HEPES, 5 EGTA, 0.1  
214 spermine, 5 QX-314, 4 ATP-Mg, and 0.3 GTP-Na. Data were filtered at 1-2 kHz and digitized at  
215 20 kHz via custom Igor Pro software (Wavemetrics, Lake Oswego, OR, USA) or Clampex 10.7  
216 software (Molecular Devices, Sunnyvale, CA, USA). Series (10-40  $\text{M}\Omega$ ) and input resistance were  
217 monitored using a depolarizing step (5 mV, 100 ms). Neurons with a holding current below -150pA  
218 were excluded from analysis. Data collection and analysis were performed as previously  
219 described (Hearing et al. 2016; Kourrich et al. 2007).

220 Notably, independent samples t-tests between mEPSC metrics from morphine challenge  
221 study Sal-Sal mice recorded using sagittal (Univ of Minn) and coronal sections (Marquette Univ)  
222 were performed. We observed no impact of slice orientation/recording location on mEPSC metrics  
223 in NAcSh D1-MSNs (Amp  $t_{(20)}=0.4359$ ,  $p=0.67$ ; Freq  $t_{(20)}=0.5078$ ,  $p=0.62$ ), NAcSh D2-MSNs (Amp  
224  $t_{(11)}=0.8798$ ,  $p=0.40$ ; Freq  $t_{(12)}=1.937$ ,  $p=0.08$ ), NAcC D1-MSNs (Amp  $t_{(18)}=0.9552$ ,  $p=0.35$ , Freq  
225  $t_{(20)}=0.5279$ ,  $p=0.60$ ), or NAcC D2-MSNs (Amp  $t_{(16)}=1.86$ ,  $p=0.08$ , Freq  $t_{(16)}=1.88$ ,  $p=0.08$ ).

226



227 *Drugs.* Picrotoxin and lidocaine were purchased from Sigma Aldrich (St. Louis, MO, USA).  
228 Morphine was purchased from the Boynton Pharmacy (University of Minnesota, Minneapolis, MN,  
229 USA) or Froedtert Hospital Pharmacy (Medical College of Wisconsin, Milwaukee, WI, USA).

230

231 *Statistical Analysis and Data Presentation.* mEPSCs were analyzed with independent samples t-  
232 tests or two-way ANOVAs using SigmaPlot (Systat Software, San Jose, CA, USA) or Graph Pad  
233 Prism (GraphPad Software, Inc., La Jolla, CA, USA). Appropriate post hoc analyses were used  
234 for pairwise comparisons as indicated. The threshold for statistical significance in all cases was  
235  $p < 0.05$ . Electrophysiology data is represented utilizing standard column graphs displaying mean  
236  $\pm$  SEM, with adjacent scatter plots of individual data points. Sample size in experiments is  
237 presented as  $n$  and  $N$ , where  $n$  is the number of cells and  $N$  is the number of mice.

238

## 239 **RESULTS**

240

### 241 **Bi-directional changes in AMPA receptor synaptic transmission in the NAcSh and NAcC**

242 We recently demonstrated that prolonged withdrawal from repeated non-contingent morphine  
243 increases excitatory drive at NAcSh D1-MSNs, while reducing drive at D2-MSNs (Hearing et al.  
244 2016). Our previous work shows that re-exposure to relapse-inducing stimuli (i.e., discrete cues,  
245 drug, stress) following abstinence or extinction promotes a transient reduction in synaptic AMPAR  
246 signaling in unidentified MSNs that drives cocaine-induced reinstatement of place preference  
247 (Benneyworth et al. in press; Brebner et al. 2005; Ebner et al. 2018; Famous et al. 2008;  
248 Ingebretson et al. 2018; Jedynek et al. 2016; Kourrich et al. 2007; Rothwell et al. 2011; Schmidt  
249 et al. 2015; Schmidt et al. 2013; Thomas et al. 2001). While the cell-type selectivity of this  
250 plasticity remains unclear, previous reports indicate that this reduction occurs in D2-MSNs  
251 (Ortinski et al. 2015). Initial studies sought to determine whether re-exposure to opioids promotes  
252 a similar bi-modal shift in synaptic strength using *ex vivo* recordings of miniature excitatory  
253 postsynaptic currents (mEPSCs) – a direct measure of synaptic AMPAR function – 24 hrs  
254 following a post abstinence (10-14 d) challenge injection. To identify effects of acute morphine  
255 exposure based on previous drug experience and ensure effects of challenge injection are  
256 specific for drug re-exposure, this experiment contained 4 experimental groups. Two groups  
257 received 5 daily injections of saline and later received a saline or morphine priming injection (Sal-  
258 Mor, Mor-Mor), and two groups receiving 5 injections of morphine followed by a saline or morphine  
259 challenge (Mor-Sal, Mor-Mor), with recordings performed 24 hrs following the challenge injection.

260 This approach permitted us to distinguish effects of repeated morphine and morphine re-  
261 exposure.

262 Two-way ANOVAs were performed on mEPSC amplitude and frequency with daily drug and  
263 challenge exposures as between subjects factors; Tukey *post hoc* analyses were performed when  
264 appropriate. In NAcSh D1-MSNs, mEPSC amplitude and frequency was elevated in Mor-Sal mice  
265 [amplitude:  $14.85 \pm 0.83$ ], frequency: ( $6.63 \pm 0.66$ )] compared to Sal-Sal controls [amplitude:  
266 ( $11.24 \pm 0.65$ ), frequency: ( $5.99 \pm 1.01$ )], and that a morphine challenge (Mor-Mor) returned  
267 amplitude and frequency to control levels [amplitude: ( $11.27 \pm 0.35$ ), frequency: ( $3.66 \pm 0.55$ )]  
268 (amplitude: interaction,  $F_{(1,65)}=4.288$ ,  $p < 0.05$ ); frequency: interaction,  $F_{(1,65)}=14.08$ ,  $p < 0.001$ )  
269 (Figure 1B). While acute morphine exposure produced a trend toward increased mEPSC  
270 frequency compared to Sal-Sal mice, these effects were not significant. In contrast to D1-MSNs,  
271 no significant main effects or interactions were observed for D2-MSN mEPSCs amplitude (daily,  
272  $F_{(1,44)}=0.3648$ ; challenge,  $F_{(1,44)}=2.197$ ,  $p=0.15$ ; interaction,  $F_{(1,44)}=0.2447$ ) or frequency (daily,  
273  $F_{(1,44)}=0.0204$ ; challenge,  $F_{(1,44)}=1.468$ ; interaction,  $F_{(1,44)}=2.646$ ,  $p=0.11$ ) (Figure 1C). These data  
274 show that acute morphine exposure does not promote lasting alterations in glutamate plasticity in  
275 the NAcSh and that morphine re-exposure promotes a bimodal effect on AMPAR signaling akin  
276 to that observed following re-exposure to psychostimulants and associated stimuli (Benneyworth  
277 et al. ; Brebner et al. 2005; Ebner et al. 2018; Famous et al. 2008; Ingebretson et al. 2018; Jedynak  
278 et al. 2016; Kourrich et al. 2007; Rothwell et al. 2011; Schmidt et al. 2015; Schmidt et al. 2013;  
279 Thomas et al. 2001), however these effects may be confined to D1-MSNs unlike cocaine (Ortinski  
280 et al. 2015).

281 In the NAcC, mEPSC amplitude in D1-MSNs from Sal-Sal ( $12.47 \pm 0.59$ ) and Sal-Mor  
282 ( $14.13 \pm 0.97$ ) were significantly higher compared to Mor-Sal ( $11.86 \pm 0.54$ ) and Mor-Mor  
283 ( $11.53 \pm 0.66$ ) (main effect of daily,  $F_{(1,57)}=6.447$ ,  $p < 0.05$ ), whereas no effects were observed for  
284 D1-MSN mEPSC frequency (daily,  $F_{(1,55)}=0.0696$ ; challenge,  $F_{(1,55)}=2.483$ ,  $p=0.12$ ; interaction,  
285  $F_{(1,55)}=0.0693$ ). Examination of D2-MSNs showed that mEPSC frequency was reduced in Mor-Sal  
286 ( $3.06 \pm 0.19$ ) compared to Sal-Sal ( $4.77 \pm 0.48$ ), and that a morphine challenge (Mor-Mor) returned  
287 mEPSC frequency to Sal-Sal control levels ( $5.44 \pm 0.22$ ) (interaction:  $F_{(1,40)}=13.96$ ,  $p < 0.001$ )  
288 (Figure 1C). No effects were observed for NAcC D2-MSN mEPSC amplitude (daily,  $F_{(1,43)}=0.0178$ ;  
289 challenge,  $F_{(1,43)}=0.682$ ; interaction,  $F_{(1,43)}=0.6136$ ). These data align with our previous findings  
290 that repeated morphine reduces excitatory drive at NAcC D2-MSNs without altering transmission  
291 at D1-MSNs, and this plasticity is bimodal in nature similar to plasticity at D1-MSNs in the NAcSh.,

292

293 **Effects of acute morphine on nucleus accumbens cell-specific AMPAR signaling**

294 Despite ample evidence indicating that glutamate transmission at NAc MSNs contributes to the  
295 rewarding effects of opioids (Dworkin et al. 1988; Graziane et al. 2016; Hearing et al. 2016; Olds  
296 1982; Vekovischeva et al. 2001), our data show that a single morphine injection has no significant  
297 impact on AMPAR mEPSC signaling in the NAcSh or NAcC 24 hrs after exposure. Previous data  
298 has shown that psychostimulant-induced plasticity in the NAc can be induced following a single  
299 exposure but requires time to develop (Kourrich et al. 2007; Terrier et al. 2016). As there are no  
300 known data on the immediate effects of acute *in vivo* opioid exposure on AMPAR transmission in  
301 the NAc (Chartoff and Connery 2014), we next investigated the impact of acute opioid exposure  
302 on AMPAR synaptic plasticity in the NAc approximately 3 hrs following an injection of saline or  
303 morphine in D1- and D2-MSNs of the NAcSh and NAcC. This timepoint was chosen to isolate  
304 reward- versus withdrawal-related effects of morphine as it aligns with elevations in drug-induced  
305 motor activity (not shown) and resides within the approximate 5-hour half-life of subcutaneous  
306 morphine administration (Hipps et al. 1976).

307 In the NAcSh, mEPSC amplitude and frequency were significantly elevated in D1-MSNs of  
308 morphine-treated animals compared to saline controls (Figure 2B) [amplitude: Sal ( $11.40 \pm 0.64$ ),  
309 Mor ( $16.25 \pm 1.28$ ),  $t_{(16)}=3.07$ ,  $p<0.01$ ]; frequency: Sal ( $5.02 \pm 0.46$ ), Mor ( $9.90 \pm 1.5$ ),  $t_{(16)}=2.79$ ,  
310  $p<0.05$ ]. Alternatively, acute morphine increased mEPSC frequency but not amplitude at D2-  
311 MSNs (Figure 2C) ([amplitude: Sal ( $15.2 \pm 0.19$ ), Mor ( $14.2 \pm 0.81$ ),  $t_{(6)}=1.22$ ,  $p=0.27$ ; frequency: Sal  
312 ( $5.95 \pm 0.53$ ), Mor ( $10.73 \pm 1.05$ ),  $t_{(6)}=4.06$ ,  $p<0.01$ ].

313 Similar to the NAcSh, acute morphine increased mEPSC amplitude and frequency at D1-  
314 MSNs in the NAcC (figure 2D) [amplitude: Sal ( $11.54 \pm 0.55$ ), Mor ( $15.43 \pm 0.92$ ),  $t_{(15)}=3.72$ ,  $p<0.01$ ;  
315 frequency: Sal ( $3.24 \pm 0.59$ ), Mor ( $6.23 \pm 1.3$ ),  $t_{(15)}=2.23$ ,  $p<0.05$ ]. However, neither amplitude or  
316 frequency of mEPSCs was altered by acute morphine at NAcC D2-MSNs (Figure 2E) [amplitude:  
317 Sal ( $11.33 \pm 0.62$ ), Mor ( $13.32 \pm 0.73$ ),  $t_{(9)}=2.022$ ,  $p=0.074$ ; frequency: Sal ( $4.36 \pm 0.66$ ), Mor  
318 ( $4.74 \pm 0.77$ ),  $t_{(9)}=0.382$ ,  $p=0.71$ ]. Taken together, these data indicate that acute morphine  
319 promotes a global augmentation of excitatory drive at D1-MSNs, whereas alterations in glutamate  
320 transmission at D2-MSNs are specific to the NAcSh, and that these adaptations do not persist or  
321 require a period of abstinence to manifest.

322

### 323 **Spontaneous withdrawal enhances AMPAR signaling at D2-MSNs**

324 In addition to our lack of knowledge about the effects of acute *in vivo* opioids on NAc synaptic  
325 transmission, few studies to date have explored the impact of withdrawal-inducing morphine  
326 administration on glutamate transmission in a NAc sub region and MSN subtype specific manner.  
327 A single injection of morphine is sufficient for precipitated withdrawal symptoms 24 hrs after

328 exposure (Rothwell et al. 2012). Further, prior studies indicate that NAcSh D2-MSNs potently  
329 regulates somatic withdrawal symptoms (Harris and Aston-Jones 1994; Russell et al. 2016; Zhu  
330 et al. 2016). This is significant given our observed plasticity 3 hrs, but not 24 hrs after a single  
331 injection of morphine. Surprisingly, no studies to date have examined cell- or region-specific NAc  
332 plasticity associated with *spontaneous* somatic withdrawal despite a purported role in relapse  
333 behavior. In order to assess adaptations associated with spontaneous withdrawal and determine  
334 whether plasticity is uniquely different following a similar withdrawal period (24 hrs) but a different  
335 regimen, we administered an escalating dose of morphine shown to produce dependence as  
336 measured by spontaneous withdrawal symptoms (Papaleo and Contarino 2006) and recorded  
337 metrics of spontaneous withdrawal 2 hrs prior to preparation for acute slice electrophysiology.  
338 Escalating doses of morphine significantly increased the number of jumps ( $t_{(17)}=2.217$ ,  $p<0.05$ ),  
339 tremors ( $t_{(17)}=2.89$ ,  $p<0.05$ ), wet dog shakes ( $t_{(17)}=2.503$ ,  $p<0.05$ ), and piloerection ( $t_{(17)}=5.037$ ,  
340  $p<0.001$ ) (table 1). No significant effect of morphine was observed on grooming behavior  
341 ( $t_{(17)}=0.729$ ,  $p=0.48$ ) or paw flutters ( $t_{(17)}=0.527$ ,  $p=0.61$ ) (table 1). More specifically, morphine  
342 significantly increased the total withdrawal score (figure 3) [Sal ( $8.19\pm1.57$ ), Mor ( $20.06\pm3.14$ ,  
343  $t_{(17)}=2.741$ ,  $p<0.05$ )], and decreased distance traveled in a novel context [Sal ( $85.73\pm8.27$ ), Mor  
344 ( $38.76\pm2.13$ ,  $t_{(17)}=6.906$ ,  $p<0.0001$ )]. Notably, in a separate cohort of mice, we examined whether  
345 somatic withdrawal symptoms persisted at 10-14 d post drug exposure – a timepoint examined in  
346 drug challenge studies. Two-way day-by-drug ANOVA with day a repeated measure and drug  
347 exposure as a between subjects factor reveal significant main effects of day ( $F_{(1,13)}=10.52$ ,  
348  $p<0.01$ ), drug ( $F_{(1,13)}=4.481$ ,  $p=0.05$ ), and a significant day-by-drug interaction ( $F_{(1,13)}=12.08$ ,  
349  $p<0.01$ ). Bonferroni post hoc analyses showed no significant impact of day on saline-exposed  
350 mice ( $p=0.99$ ) but a significant decrease in withdrawal score after 14-day abstinence in morphine-  
351 exposed mice ( $p<0.001$ ).

352 To identify plasticity that parallel withdrawal symptoms, we measured mEPSCs at D1- and  
353 D2-MSNs in the NAcC and NAcSh subregions 24 hrs following the final injection of morphine and  
354 2 hrs post behavior assessment. In the NAcSh, neither the amplitude or frequency of mEPSCs  
355 were altered in D1-MSNs (Figure 3C) [amplitude: Sal ( $12.75\pm1.23$ ), Mor ( $12.01\pm0.61$ ),  $t_{(15)}=0.612$ ,  
356  $p=0.55$ ; frequency: Sal ( $5.58\pm0.72$ ), Mor ( $4.84\pm0.50$ ),  $t_{(15)}=0.862$ ,  $p=0.40$ ]. Conversely, a  
357 significant increase in frequency but not amplitude was observed in D2-MSNs (Figure 3C):  
358 [amplitude: Sal ( $10.39\pm1.41$ ), Mor ( $11.12\pm0.81$ ),  $t_{(15)}=0.487$ ,  $p=0.63$ ; frequency: Sal ( $2.94\pm0.27$ ),  
359 Mor ( $6.40\pm0.86$ ),  $t_{(15)}=2.876$ ,  $p<0.05$ ]. In the NAcC, morphine had no effect on mEPSC amplitude  
360 or frequency in D1-MSNs (Figure 3D) [amplitude: Sal ( $12.76\pm0.94$ ), Mor ( $13.49\pm0.67$ ),  $t_{(18)}=0.655$ ,  
361  $p=0.52$ ; frequency: Sal ( $3.01\pm0.68$ ), Mor ( $4.25\pm0.47$ ),  $t_{(18)}=1.558$ ,  $p=0.14$ ] or D2-MSNs (Figure 3D)

362 [amplitude: Sal ( $9.01 \pm 0.42$ ), Mor ( $9.80 \pm 0.60$ ),  $t_{(14)} = 0.832$ ,  $p = 0.42$ ; frequency: Sal ( $3.52 \pm 1.34$ ), Mor  
363 ( $1.9 \pm 0.33$ ),  $t_{(14)} = 1.536$ ,  $p = 0.15$ ]. Taken together, these findings suggest that, similar to naloxone-  
364 precipitated withdrawal (Zhu et al. 2016), spontaneous somatic withdrawal selectively increases  
365 excitatory drive at D2-MSNs in the NAcSh and that these effects are more enduring than  
366 previously known. Further, these data support the notion that adaptations 10-14 d following a less  
367 robust morphine regimen (5 x 10 mg/kg) or lack thereof 24 hrs following acute exposure is not  
368 associated with enduring somatic withdrawal, and that the lack of plasticity observed 24 hrs  
369 following an acute injection is distinctly different from withdrawal associated plasticity at a similar  
370 timepoint.

371

### 372 **Inhibiting endocytosis of AMPA receptors in the NAcSh enhances morphine-primed** 373 **reinstatement of place preference**

374 Inhibiting NAc GluA2-containing AMPAR trafficking disrupts amphetamine-induced  
375 sensitization and attenuates cocaine-induced reinstatement of cocaine-seeking and place  
376 preference (Benneyworth et al. in press; Brebner et al. 2005; Famous et al. 2008), suggesting  
377 that reductions in AMPAR signaling may reflect transient plasticity that triggers relapse-related  
378 behavior. Therefore, we examined whether morphine-induced depotentiation of AMPAR-signaling  
379 involves receptor endocytosis and if this plasticity is causally involved in reinstatement of reward  
380 behavior. As plasticity was largely confined to the NAcSh, we focused our efforts for this  
381 experiment in this sub-region. Using an approach previously shown to produce AMPAR plasticity  
382 and conditioned place preference (Hearing et al. 2016), all mice were initially conditioned with  
383 morphine (5 mg/kg). Mice were subsequently divided into three experimental groups, one group  
384 infused with the active peptide (Tat-GluA2<sub>3Y</sub>) and receiving a saline priming injection  
385 (Mor/Tat(+)/Sal), a second group receiving the active peptide and a priming injection of morphine  
386 (Mor/Tat(+)/Mor), and a third infused with the inactive (Tat-GluA2<sub>3S</sub>) isoform and receiving a  
387 morphine prime (Mor/Tat(-)/Mor).

388 A Two-way ANOVA with test day as a repeated measure and treatment group as a between  
389 subjects factor revealed a significant day-by-treatment interaction ( $F_{(6,135)} = 2.84$ ,  $p < 0.05$ ). Post hoc  
390 pairwise multiple comparisons showed that all three groups exhibited significant place preference  
391 compared to pre-test preference levels, and that preference did not significantly differ across all  
392 three groups during pre-test, preference, or extinction. For reinstatement testing, mice infused  
393 with the inactive Tat-GluA2<sub>3S</sub> peptide receiving a morphine prime displayed a significant increase  
394 in preference compared to Tat-GluA2<sub>3Y</sub> infused mice injected with saline (Figure 4B<sub>1</sub>)  
395 [Mor/Tat(+)/Sal ( $45.52 \pm 83.7$ ), Mor/Tat(-)/Mor ( $449 \pm 79.05$ );  $p < 0.001$ ], while morphine primed mice



396 infused with the active peptide (Mor/Tat(+)/Mor:  $666 \pm 87.8$ ) showed a significant increase in  
397 preference reinstatement compared to both groups ( $p < 0.05$  vs. Mor/Tat(-)/Mor;  $p < 0.001$  vs.  
398 Mor/Tat(+)/Sal], indicating that blockade of AMPAR endocytosis enhanced reinstatement of place  
399 preference. Approximately 30-90 min following testing, *ex vivo* analysis of mEPSCs (Figure 4B<sub>2</sub>)  
400 showed that mEPSC amplitude at D1-MSNs was significantly greater in mice infused with active  
401 Tat-GluA2<sub>3Y</sub> compared to the inactive Tat-GluA2<sub>3S</sub> [Mor/Tat(-)/Mor  $16.76 \pm 1.87$ , Mor/Tat(+)/Mor  
402  $11.24 \pm 0.32$ ,  $t_{(6)} = 2.911$ ,  $p < 0.05$ ]. No significant effect of Tat peptide on mEPSC frequency was  
403 observed [Mor/Tat(-)/Mor ( $3.25 \pm 0.48$ ), Mor/Tat(+)/Mor ( $4.35 \pm 0.95$ ),  $t_{(6)} = 1.032$ ,  $p = 0.34$ ].  
404 Collectively, these data indicate that re-exposure to morphine drives endocytosis of AMPA  
405 receptors at D1-MSNs unlike cocaine (Benneyworth et al. in press), and preventing such  
406 endocytosis exacerbates reinstatement of morphine-induced conditioned place preference.

407

## 408 **DISCUSSION**

409 Here we identify temporal- and region-specific changes in AMPAR signaling within discrete  
410 subpopulations of NAc MSNs associated with opioid reward, withdrawal, and relapse-like  
411 behavior. In agreement with our previous findings, we showed that protracted withdrawal from  
412 repeated morphine is associated with increases in synaptic drive at D1- and decreases at D2-  
413 MSNs predominantly in the NAcSh (Hearing et al. 2016). Similar to amphetamine and cocaine  
414 (Benneyworth et al. in press; Jedynak et al. 2016; Kourrich et al. 2007), re-exposure to morphine  
415 produced bimodal plasticity, however, unlike cocaine, re-exposure to morphine triggered a  
416 reduction in drive at D1- and increased drive at D2-MSNs (Figure 1; Ortinski et al., 2015). In  
417 contrast, acute morphine produced a transient increase in AMPAR-mediated neurotransmission  
418 at D1-MSNs in the NAcC and NAcSh (Figure 2) whereas spontaneous withdrawal aligned with  
419 enhanced excitatory drive at D2-MSNs selectively in the NAcSh (Figure 3). Unlike our previous  
420 findings with cocaine, blocking the underlying AMPAR endocytosis augmented rather than  
421 inhibited reinstatement of place preference following extinction training (Figure 4), suggesting that  
422 similar forms of plasticity and post-drug experience may have distinct behavioral consequences  
423 across drug classes.

424

### 425 **Acute morphine plasticity**

426 Despite evidence that opioids acutely reduce glutamate release in the NAc (Martin et al. 1997;  
427 Sepulveda et al. 1998), relatively little is known regarding the role of NAc postsynaptic AMPAR  
428 and NMDAR signaling in the acute rewarding effects of opioids. Biochemical data have shown  
429 that expression of AMPARs is decreased in the NAcC 3 days following an acute morphine

430 exposure (Jacobs et al. 2005) and that GluA1 surface expression is reduced in combined NAc  
431 tissue 24 hrs following acute exposure (Herrold et al. 2013). In the present study, we found that  
432 AMPAR-mediated mEPSC amplitude and frequency was elevated at D1-MSNs in the NAcC and  
433 NAcSh 3 hrs following an acute injection of morphine. Unlike previous studies, this time course  
434 aligns with residual motor activity following drug exposure as well as the acute rewarding effects  
435 of morphine rather than withdrawal (Rothwell et al. 2012). The NAcC plays a key role in initializing  
436 reward-related motor activity (Sesack and Grace 2010; Shiflett and Balleine 2011; Voorn et al.  
437 2004) and the NAcSh in opioid-related reward and reinforcement learning (Graziane et al. 2016;  
438 Hearing et al. 2016; Heimer et al. 1997; Sesack and Grace 2010). Moreover, recent findings have  
439 shown that activation of NAc D1-MSN circuits promotes reward and addiction-related behavior  
440 (Dobi et al. 2011; Graziane et al. 2016; Hearing et al. 2018; Hearing et al. 2016; Kim et al. 2011;  
441 Lobo et al. 2010; Ortinski et al. 2015; Ortinski et al. 2012; Pascoli et al. 2011; Smith et al. 2013;  
442 Suska et al. 2013). Thus, increased signaling at D1-MSNs in the NAcSh and NAcC likely  
443 contribute to the rewarding and psychomotor effects of acute morphine, respectively. This is  
444 reflected in enhanced drug-induced behavioral output observed after repeated and acute  
445 morphine (Hearing et al. 2016); behavior blunted by depotentiation of postsynaptic AMPAR  
446 signaling.

447 It remains unclear whether elevations in AMPAR transmission at D1-MSNs in the NAcSh  
448 and NAcC reflect pre- or postsynaptic events. Accordingly, observed increases in mEPSC  
449 frequency may be attributed to increased receptor (or synapse) number rather than glutamate  
450 release probability (Graziane et al. 2016; Kerchner and Nicoll 2008) given the dampening effects  
451 of acute opioids on glutamate release in the nucleus accumbens (Sepulveda et al. 2004). Recent  
452 work has shown that a single cocaine exposure upregulates NAcSh GluA2-lacking AMPAR  
453 signaling at NAcSh D1R-MSN synapses – an adaptation observed 7, but not 1 day following drug  
454 exposure (Terrier et al. 2016). Although an in-depth comparison of cocaine-induced changes at  
455 the acute post exposure period used here is lacking, acute morphine adaptations in the NAcSh  
456 also appear to require a period of withdrawal, as they were not observed 24 hrs following  
457 exposure. Alternatively, while mEPSC amplitude and frequency and GluA1 surface expression  
458 are elevated in pooled MSNs and tissue punches during early withdrawal from acute  
459 amphetamine and repeated cocaine, no changes in mEPSCs were observed 24 hrs following  
460 acute morphine in the present study. Although the reason for this distinction is unclear, it may  
461 reflect a higher prevalence of mu opioid receptors in the NAcSh compared to the NAcC (Svingos  
462 et al. 1997). Regardless, given increasing evidence that opioids and psychostimulants produce  
463 divergent neurophysiological and behavior effects, an important question moving forward will be



464 to determine whether increased AMPAR signaling with acute morphine merely reflects a synaptic  
465 scaling event in response to reduced glutamate availability or if this plasticity persists.

466

### 467 **Withdrawal-related AMPAR plasticity**

468 In addition to reward, increased AMPAR signaling in the NAcSh has also been attributed to  
469 aversive effects of morphine withdrawal (Russell et al. 2016; Sepulveda et al. 2004). Indirect  
470 pharmacological evidence as well as direct measures of synaptic plasticity indicate that these  
471 adaptations may be confined to D2-MSNs in the NAc (Harris and Aston-Jones 1994; Russell et  
472 al. 2016; Zhu et al. 2016). In the present study we show for the first time that, similar to naloxone-  
473 precipitated withdrawal, spontaneous somatic withdrawal aligns with increased glutamate  
474 transmission selectively at D2-MSNs in the NAcSh. Surprisingly, a similar phenomenon was also  
475 observed immediately following acute morphine exposure in both instances, though effects were  
476 confined to changes in mEPSC frequency. This may reflect increases in quantal release from  
477 pooled inputs, as withdrawal-related aversion memories are associated with increased signaling  
478 at thalamus but not prefrontal cortex or amygdala inputs at D2-MSNs (Zhu et al. 2016), but not  
479 definitively excluding a potential change in AMPAR expression (Graziane et al. 2016; Kerchner  
480 and Nicoll 2008). Importantly, we also observed that acute morphine increased signaling at  
481 NAcSh and NAcC D1-MSNs, possibly offsetting of the negative affect of a single post-morphine  
482 exposure.

483 Although a single exposure to morphine does not evoke spontaneous withdrawal, naloxone-  
484 precipitated withdrawal is possible 24 hrs after a single injection of morphine (Rothwell et al.  
485 2012). Thus, our findings appear to agree with conclusions drawn by Russel et al., (2016) in that  
486 upregulation of glutamate transmission (at D2-MSNs in the present study) may reflect plasticity  
487 that primes NAc circuits for subsequent activation upon withdrawal (Russell et al. 2016). Although  
488 unclear, the apparent discrepancy between observed reductions in GluA2-lacking AMPAR  
489 surface expression immediately following precipitated withdrawal (Russell et al. 2016) and lack of  
490 changes to amplitude in the present study may reflect distinctions in the time of observation (30  
491 min vs. 24 hrs) or method of withdrawal (precipitated vs spontaneous). Alternatively, because  
492 mEPSCs likely reflect binding at receptors in the synapse, it is possible that reduced surface  
493 expression detected using biochemical measures (e.g., biotinylation) reflect sampling from  
494 synaptic *and* peri/extra-synaptic AMPARs that have been primed but not trafficked to or from the  
495 postsynaptic density.

496

### 497 **Region- and cell-specific bimodal AMPAR plasticity**

498 Our previous findings show that 10-14 days after repeated morphine increases expression of  
499 GluA2-lacking AMPARs at pooled inputs to D1-MSNs while reducing excitatory drive at D2-MSNs  
500 in the NAcSh and NAcC (Hearing et al. 2016). In the present study, we also observed reductions  
501 in mEPSC frequency at NAcC D2-MSNs, but only a trend towards reduced signaling at NAcSh  
502 D2-MSNs. The prominence of plasticity in the NAcSh vs NAcC appears to contrast effects of  
503 repeated cocaine, but is consistent with findings following 10-14 d withdrawal from repeated  
504 amphetamine (Jedynak et al. 2016), however these effects have not been readily characterized  
505 in D1- vs D2-MSNs. In the current study, reductions in AMPAR signaling following morphine re-  
506 exposure were ostensibly isolated to D1-MSNs (Figure 1B). In turn, morphine treated mice infused  
507 with the active Tat peptide in the NAcSh exhibited increased mEPSC amplitudes compared to  
508 those infused with the inactive form (Figure 4B). Thus, morphine re-exposure likely triggers  
509 endocytosis of synaptic GluA2-containing AMPARs in NAcSh D1-MSNs. Further, as the Tat  
510 peptide inhibits activity-dependent rather than constitutive removal of synaptic GluA2-containing  
511 AMPARs, this endocytosis is more likely to reflect a rapid, LTD-like process than a slow and  
512 consistent removal of synaptic AMPARs over time (Ahmadian et al. 2004; Dong et al. 2015; Lee  
513 et al. 2002; Scholz et al. 2010; Wang et al. 2017; Yoon et al. 2009).

514 It should be noted that the precision of Tat injections in the current study was not specific with  
515 regards to the rostral-caudal and dorsal-ventral axis. This is significant as prior work has shown  
516 distinctions in how NAcSh cell subpopulations and AMPAR signaling along the dorsal-ventral and  
517 rostro-caudal gradient differentially regulate reward- and aversive-driven behavior (Reynolds and  
518 Berridge 2003). As our recordings were primarily, but not exclusively, focused within the dorsal-  
519 medial region with even distribution along the rostral-caudal axis, it will be important for future  
520 studies to examine anatomical distinctions when identifying causality between plasticity and  
521 behavior.

522 Our current findings indicate that re-exposure to morphine promotes of AMPAR endocytosis  
523 specifically at D1-MSN synapses previously potentiated during withdrawal from morphine,  
524 however it is possible that reductions in synaptic strength may be occurring at adjacent, rather  
525 than previously potentiated synapses – a possibility difficult to demonstrate definitively. Further,  
526 although it is impossible to exclude, it is unlikely that inclusion of extinction produced alternate  
527 plasticity in CPP studies compared to those observed in challenge experiments involving home  
528 cage abstinence, as our previous work showed identical cell-specific plasticity in mice following  
529 home cage abstinence and extinction. While the significance of this bimodal phenomenon is not  
530 yet clear, one intriguing possibility is that re-exposure to opioids may represent a temporary  
531 quelling of drug craving and in turn a trend towards returning to prior levels of D1-MSN excitation.

532

### 533 **Role of bidirectional plasticity in reinstatement**

534 Our previous work showed that *in vivo* reversal of morphine-induced pathophysiology at NAcSh  
535 D1-MSNs with optogenetic stimulation or treatment with the antibiotic, ceftriaxone, blocked  
536 reinstatement of morphine-evoked place preference (Hearing et al. 2016). One straightforward  
537 interpretation of these findings is that a progressive enhancement of AMPAR signaling during  
538 withdrawal serves as a common mechanism for driving addiction-related behavior (Kalivas 2009;  
539 Kalivas and Hu 2006), and that reducing synaptic strength prior to drug re-exposure impairs drug-  
540 induced behavior. This contention is also supported by numerous studies showing that re-  
541 exposure to drug or drug-associated cues induces a rapid potentiation (i.e., release) of NAc  
542 glutamatergic signaling in cocaine, nicotine, or heroin withdrawn rats (Gipson et al. 2013a; Gipson  
543 et al. 2013b; Shen et al. 2011; Trantham-Davidson et al. 2012).

544 On the other hand, recent work by our group and others indicate that re-exposure to cocaine  
545 triggers a rapid reduction in synaptic strength in the NAc akin to LTD (Benneyworth et al. in press;  
546 Ebner et al. 2018; Ingebretson et al. 2018; Jedynak et al. 2016), and that this short-term plasticity  
547 is necessary and sufficient to reinstate place preference (Benneyworth et al. in press) –  
548 suggesting that *decreases* in excitatory drive onto NAc MSNs, particularly in the NAcSh, may  
549 promote reinstatement to drug seeking. Thus, our previously observed blockade of preference  
550 reinstatement may merely reflect an occlusion of short-term plasticity associated with morphine  
551 re-exposure and the ability to trigger behavior (Hearing et al. 2016; Pascoli et al. 2014; Pascoli et  
552 al. 2011). In the present study, blockade of AMPAR endocytosis augmented reinstatement of  
553 place preference, thus, unlike cocaine, increased expression of AMPAR during abstinence  
554 appears to be the primary driver of reinstatement, with internalization of AMPARs following  
555 morphine re-exposure perhaps reflecting a secondary synaptic scaling (Turrigiano 2008) in  
556 response to augmented glutamate release, but see (Siahposht-Khachaki et al. 2017). Regardless,  
557 these findings show that although two distinct drug classes can produce seemingly similar forms  
558 of plasticity, the behavioral consequences of this plasticity appear to be profoundly different.

559

### 560 **Conclusion**

561 Though psychostimulants and opioids share rewarding properties that can lead to uncontrollable  
562 drug use and relapse vulnerability, opioids are addictive substances with the ability to induce  
563 chemical dependence from which relapse is driven by attempts to alleviate somatic and  
564 psychological withdrawal symptoms. By modeling dosing regimens in a preclinical setting, we  
565 sought to parallel acute, repeated, and dependence-inducing opioid consumption. Analysis of

566 AMPAR signaling from each dosing revealed unique and overlapping neuroplasticity to excitatory  
567 signaling at NAcSh and NAcC MSNs. Future therapeutic interventions should take into  
568 consideration that drug-induced neuroplasticity shared across drug classes does not inherently  
569 share functional consequences at the level of the neural circuit or in terms of behavior. Thus,  
570 more thorough characterization of opioid-induced plasticity is needed to provide more efficient  
571 and effective therapies for opioid use disorder.  
572

- 573 Ahmadian G et al. (2004) Tyrosine phosphorylation of GluR2 is required for insulin-stimulated  
574 AMPA receptor endocytosis and LTD EMBO J 23:1040-1050  
575 doi:10.1038/sj.emboj.7600126
- 576 Badiani A, Belin D, Epstein D, Calu D, Shaham Y (2011) Opiate versus psychostimulant  
577 addiction: the differences do matter Nat Rev Neurosci 12:685-700 doi:10.1038/nrn3104
- 578 Baharlouei N, Sarihi A, Komaki A, Shahidi S, Haghparast A (2015) Blockage of acquisition and  
579 expression of morphine-induced conditioned place preference in rats due to activation of  
580 glutamate receptors type II/III in nucleus accumbens Pharmacol Biochem Behav  
581 135:192-198 doi:10.1016/j.pbb.2015.06.004
- 582 Benneyworth MA et al. (in press) Synaptic depotentiation and mGluR5 activity in the nucleus  
583 accumbens drives cocaine-primed reinstatement of place preference Journal of  
584 Neuroscience
- 585 Bossert JM, Busch RF, Gray SM (2005) The novel mGluR2/3 agonist LY379268 attenuates  
586 cue-induced reinstatement of heroin seeking Neuroreport 16:1013-1016
- 587 Bossert JM, Gray SM, Lu L, Shaham Y (2006) Activation of group II metabotropic glutamate  
588 receptors in the nucleus accumbens shell attenuates context-induced relapse to heroin  
589 seeking Neuropsychopharmacology 31:2197-2209 doi:10.1038/sj.npp.1300977
- 590 Brebner K et al. (2005) Nucleus accumbens long-term depression and the expression of  
591 behavioral sensitization Science 310:1340-1343 doi:10.1126/science.1116894
- 592 Chartoff EH, Connery HS (2014) It's MORE exciting than mu: crosstalk between mu opioid  
593 receptors and glutamatergic transmission in the mesolimbic dopamine system Front  
594 Pharmacol 5:116 doi:10.3389/fphar.2014.00116
- 595 Clem RL, Haganir RL (2013) Norepinephrine enhances a discrete form of long-term depression  
596 during fear memory storage J Neurosci 33:11825-11832 doi:10.1523/JNEUROSCI.3317-  
597 12.2013
- 598 Cruz HG, Berton F, Sollini M, Blanchet C, Pravetoni M, Wickman K, Luscher C (2008) Absence  
599 and rescue of morphine withdrawal in GIRK/Kir3 knock-out mice J Neurosci 28:4069-  
600 4077 doi:10.1523/JNEUROSCI.0267-08.2008
- 601 Desole MS et al. (1996) Effects of morphine treatment and withdrawal on striatal and limbic  
602 monoaminergic activity and ascorbic acid oxidation in the rat Brain Res 723:154-161
- 603 Dobi A, Seabold GK, Christensen CH, Bock R, Alvarez VA (2011) Cocaine-induced plasticity in  
604 the nucleus accumbens is cell specific and develops without prolonged withdrawal J  
605 Neurosci 31:1895-1904 doi:10.1523/JNEUROSCI.5375-10.2011
- 606 Dong Z et al. (2015) Long-term potentiation decay and memory loss are mediated by AMPAR  
607 endocytosis J Clin Invest 125:234-247 doi:10.1172/JCI77888
- 608 Dworkin SI, Guerin GF, Goeders NE, Smith JE (1988) Kainic acid lesions of the nucleus  
609 accumbens selectively attenuate morphine self-administration Pharmacol Biochem  
610 Behav 29:175-181
- 611 Ebner SR, Larson EB, Hearing MC, Ingebretson AE, Thomas MJ (2018) Extinction and  
612 Reinstatement of Cocaine-seeking in Self-administering Mice is Associated with  
613 Bidirectional AMPAR-mediated Plasticity in the Nucleus Accumbens Shell Neuroscience  
614 384:340-349 doi:10.1016/j.neuroscience.2018.05.043
- 615 Enrico P et al. (1998) Effect of naloxone on morphine-induced changes in striatal dopamine  
616 metabolism and glutamate, ascorbic acid and uric acid release in freely moving rats  
617 Brain Res 797:94-102
- 618 Everitt BJ, Parkinson JA, Olmstead MC, Arroyo M, Robledo P, Robbins TW (1999) Associative  
619 processes in addiction and reward. The role of amygdala-ventral striatal subsystems  
620 Ann N Y Acad Sci 877:412-438
- 621 Famous KR, Kumaresan V, Sadri-Vakili G, Schmidt HD, Mierke DF, Cha JH, Pierce RC (2008)  
622 Phosphorylation-dependent trafficking of GluR2-containing AMPA receptors in the

- 623 nucleus accumbens plays a critical role in the reinstatement of cocaine seeking J  
624 Neurosci 28:11061-11070 doi:10.1523/JNEUROSCI.1221-08.2008
- 625 Fujio M et al. (2005) Gene transfer of GLT-1, a glutamate transporter, into the nucleus  
626 accumbens shell attenuates methamphetamine- and morphine-induced conditioned  
627 place preference in rats Eur J Neurosci 22:2744-2754 doi:10.1111/j.1460-  
628 9568.2005.04467.x
- 629 Gipson CD, Kupchik YM, Shen H, Reissner KJ, Thomas CA, Kalivas PW (2013a) Relapse  
630 induced by cues predicting cocaine depends on rapid, transient synaptic potentiation  
631 Neuron 77:867-872 doi:10.1016/j.neuron.2013.01.005
- 632 Gipson CD, Reissner KJ, Kupchik YM, Smith AC, Stankeviciute N, Hensley-Simon ME, Kalivas  
633 PW (2013b) Reinstatement of nicotine seeking is mediated by glutamatergic plasticity  
634 Proc Natl Acad Sci U S A 110:9124-9129 doi:10.1073/pnas.1220591110
- 635 Gracy KN, Dankiewicz LA, Koob GF (2001) Opiate withdrawal-induced fos immunoreactivity in  
636 the rat extended amygdala parallels the development of conditioned place aversion  
637 Neuropsychopharmacology 24:152-160 doi:10.1016/S0893-133X(00)00186-X
- 638 Graziane NM et al. (2016) Opposing mechanisms mediate morphine- and cocaine-induced  
639 generation of silent synapses Nat Neurosci 19:915-925 doi:10.1038/nn.4313
- 640 Harris GC, Aston-Jones G (1994) Involvement of D2 dopamine receptors in the nucleus  
641 accumbens in the opiate withdrawal syndrome Nature 371:155-157  
642 doi:10.1038/371155a0
- 643 Hearing M (2019) Prefrontal-accumbens opioid plasticity: Implications for relapse and  
644 dependence Pharmacol Res 139:158-165 doi:10.1016/j.phrs.2018.11.012
- 645 Hearing M, Graziane N, Dong Y, Thomas MJ (2018) Opioid and Psychostimulant Plasticity:  
646 Targeting Overlap in Nucleus Accumbens Glutamate Signaling Trends Pharmacol Sci  
647 39:276-294 doi:10.1016/j.tips.2017.12.004
- 648 Hearing M, Kotecki L, Marron Fernandez de Velasco E, Fajardo-Serrano A, Chung HJ, Lujan R,  
649 Wickman K (2013) Repeated cocaine weakens GABA(B)-Girk signaling in layer 5/6  
650 pyramidal neurons in the prelimbic cortex Neuron 80:159-170  
651 doi:10.1016/j.neuron.2013.07.019
- 652 Hearing MC et al. (2016) Reversal of morphine-induced cell-type-specific synaptic plasticity in  
653 the nucleus accumbens shell blocks reinstatement Proc Natl Acad Sci U S A 113:757-  
654 762 doi:10.1073/pnas.1519248113
- 655 Heimer L, Alheid GF, de Olmos JS, Groenewegen HJ, Haber SN, Harlan RE, Zahm DS (1997)  
656 The accumbens: beyond the core-shell dichotomy J Neuropsychiatry Clin Neurosci  
657 9:354-381 doi:10.1176/jnp.9.3.354
- 658 Heimer L, Zahm DS, Churchill L, Kalivas PW, Wohltmann C (1991) Specificity in the projection  
659 patterns of accumbal core and shell in the rat Neuroscience 41:89-125
- 660 Herrold AA, Persons AL, Napier TC (2013) Cellular distribution of AMPA receptor subunits and  
661 mGlu5 following acute and repeated administration of morphine or methamphetamine J  
662 Neurochem 126:503-517 doi:10.1111/jnc.12323
- 663 Hipps PP, Eveland MR, Meyer ER, Sherman WR, Cicero TJ (1976) Mass fragmentography of  
664 morphine: relationship between brain levels and analgesic activity J Pharmacol Exp Ther  
665 196:642-648
- 666 Ingebretson AE, Hearing MC, Huffington ED, Thomas MJ (2018) Endogenous dopamine and  
667 endocannabinoid signaling mediate cocaine-induced reversal of AMPAR synaptic  
668 potentiation in the nucleus accumbens shell Neuropharmacology 131:154-165  
669 doi:10.1016/j.neuropharm.2017.12.011
- 670 Jacobs EH, Wardeh G, Smit AB, Schoffelmeer AN (2005) Morphine causes a delayed increase  
671 in glutamate receptor functioning in the nucleus accumbens core Eur J Pharmacol  
672 511:27-30 doi:10.1016/j.ejphar.2005.02.009



- 673 Jedynak J et al. (2016) Cocaine and Amphetamine Induce Overlapping but Distinct Patterns of  
674 AMPAR Plasticity in Nucleus Accumbens Medium Spiny Neurons  
675 *Neuropsychopharmacology* 41:464-476 doi:10.1038/npp.2015.168  
676 Kalivas PW (2009) The glutamate homeostasis hypothesis of addiction *Nat Rev Neurosci*  
677 10:561-572 doi:10.1038/nrn2515  
678 Kalivas PW, Hu XT (2006) Exciting inhibition in psychostimulant addiction *Trends Neurosci*  
679 29:610-616 doi:10.1016/j.tins.2006.08.008  
680 Kerchner GA, Nicoll RA (2008) Silent synapses and the emergence of a postsynaptic  
681 mechanism for LTP *Nat Rev Neurosci* 9:813-825 doi:10.1038/nrn2501  
682 Kim J, Park BH, Lee JH, Park SK, Kim JH (2011) Cell type-specific alterations in the nucleus  
683 accumbens by repeated exposures to cocaine *Biol Psychiatry* 69:1026-1034  
684 doi:10.1016/j.biopsych.2011.01.013  
685 Koob GF, Wall TL, Bloom FE (1989) Nucleus accumbens as a substrate for the aversive  
686 stimulus effects of opiate withdrawal *Psychopharmacology (Berl)* 98:530-534  
687 Kourrich S, Rothwell PE, Klug JR, Thomas MJ (2007) Cocaine experience controls bidirectional  
688 synaptic plasticity in the nucleus accumbens *J Neurosci* 27:7921-7928  
689 doi:10.1523/JNEUROSCI.1859-07.2007  
690 Le Moine C, Bloch B (1995) D1 and D2 dopamine receptor gene expression in the rat striatum:  
691 sensitive cRNA probes demonstrate prominent segregation of D1 and D2 mRNAs in  
692 distinct neuronal populations of the dorsal and ventral striatum *J Comp Neurol* 355:418-  
693 426 doi:10.1002/cne.903550308  
694 Lee SH, Liu L, Wang YT, Sheng M (2002) Clathrin adaptor AP2 and NSF interact with  
695 overlapping sites of GluR2 and play distinct roles in AMPA receptor trafficking and  
696 hippocampal LTD *Neuron* 36:661-674  
697 Lobo DS, Kennedy JL (2006) The genetics of gambling and behavioral addictions *CNS Spectr*  
698 11:931-939  
699 Lobo MK et al. (2010) Cell type-specific loss of BDNF signaling mimics optogenetic control of  
700 cocaine reward *Science* 330:385-390 doi:10.1126/science.1188472  
701 Ma YY et al. (2014) Bidirectional modulation of incubation of cocaine craving by silent synapse-  
702 based remodeling of prefrontal cortex to accumbens projections *Neuron* 83:1453-1467  
703 doi:10.1016/j.neuron.2014.08.023  
704 Martin G, Nie Z, Siggins GR (1997) mu-Opioid receptors modulate NMDA receptor-mediated  
705 responses in nucleus accumbens neurons *J Neurosci* 17:11-22  
706 Olds ME (1982) Reinforcing effects of morphine in the nucleus accumbens *Brain Res* 237:429-  
707 440  
708 Ortinski PI, Briand LA, Pierce RC, Schmidt HD (2015) Cocaine-seeking is associated with PKC-  
709 dependent reduction of excitatory signaling in accumbens shell D2 dopamine receptor-  
710 expressing neurons *Neuropharmacology* 92:80-89  
711 doi:10.1016/j.neuropharm.2015.01.002  
712 Ortinski PI, Vassoler FM, Carlson GC, Pierce RC (2012) Temporally dependent changes in  
713 cocaine-induced synaptic plasticity in the nucleus accumbens shell are reversed by D1-  
714 like dopamine receptor stimulation *Neuropsychopharmacology* 37:1671-1682  
715 doi:10.1038/npp.2012.12  
716 Papaleo F, Contarino A (2006) Gender- and morphine dose-linked expression of spontaneous  
717 somatic opiate withdrawal in mice *Behav Brain Res* 170:110-118  
718 doi:10.1016/j.bbr.2006.02.009  
719 Pascoli V, Terrier J, Espallergues J, Valjent E, O'Connor EC, Luscher C (2014) Contrasting  
720 forms of cocaine-evoked plasticity control components of relapse *Nature* 509:459-464  
721 doi:10.1038/nature13257  
722 Pascoli V, Turiault M, Luscher C (2011) Reversal of cocaine-evoked synaptic potentiation resets  
723 drug-induced adaptive behaviour *Nature* 481:71-75 doi:10.1038/nature10709



- 724 Reynolds SM, Berridge KC (2003) Glutamate motivational ensembles in nucleus accumbens:  
725 rostromedial shell gradients of fear and feeding *Eur J Neurosci* 17:2187-2200
- 726 Rothwell PE, Kourrich S, Thomas MJ (2011) Synaptic adaptations in the nucleus accumbens  
727 caused by experiences linked to relapse *Biol Psychiatry* 69:1124-1126  
728 doi:10.1016/j.biopsych.2010.12.028
- 729 Rothwell PE, Thomas MJ, Gewirtz JC (2012) Protracted manifestations of acute dependence  
730 after a single morphine exposure *Psychopharmacology (Berl)* 219:991-998  
731 doi:10.1007/s00213-011-2425-y
- 732 Russell SE, Puttick DJ, Sawyer AM, Potter DN, Mague S, Carlezon WA, Jr., Chartoff EH (2016)  
733 Nucleus Accumbens AMPA Receptors Are Necessary for Morphine-Withdrawal-Induced  
734 Negative-Affective States in Rats *J Neurosci* 36:5748-5762  
735 doi:10.1523/JNEUROSCI.2875-12.2016
- 736 Schmidt HD, Kimmey BA, Arreola AC, Pierce RC (2015) Group I metabotropic glutamate  
737 receptor-mediated activation of PKC gamma in the nucleus accumbens core promotes  
738 the reinstatement of cocaine seeking *Addict Biol* 20:285-296 doi:10.1111/adb.12122
- 739 Schmidt HD, Schassburger RL, Guercio LA, Pierce RC (2013) Stimulation of mGluR5 in the  
740 accumbens shell promotes cocaine seeking by activating PKC gamma *J Neurosci*  
741 33:14160-14169 doi:10.1523/JNEUROSCI.2284-13.2013
- 742 Scholz R, Berberich S, Rathgeber L, Kollerker A, Kohr G, Kornau HC (2010) AMPA receptor  
743 signaling through BRAG2 and Arf6 critical for long-term synaptic depression *Neuron*  
744 66:768-780 doi:10.1016/j.neuron.2010.05.003
- 745 Schulteis G, Markou A, Gold LH, Stinus L, Koob GF (1994) Relative sensitivity to naloxone of  
746 multiple indices of opiate withdrawal: a quantitative dose-response analysis *J Pharmacol*  
747 *Exp Ther* 271:1391-1398
- 748 Sepulveda J, Oliva P, Contreras E (2004) Neurochemical changes of the extracellular  
749 concentrations of glutamate and aspartate in the nucleus accumbens of rats after  
750 chronic administration of morphine *Eur J Pharmacol* 483:249-258
- 751 Sepulveda MJ, Hernandez L, Rada P, Tucci S, Contreras E (1998) Effect of precipitated  
752 withdrawal on extracellular glutamate and aspartate in the nucleus accumbens of  
753 chronically morphine-treated rats: an in vivo microdialysis study *Pharmacol Biochem*  
754 *Behav* 60:255-262
- 755 Sesack SR, Grace AA (2010) Cortico-Basal Ganglia reward network: microcircuitry  
756 *Neuropsychopharmacology* 35:27-47 doi:10.1038/npp.2009.93
- 757 Shen H, Moussawi K, Zhou W, Toda S, Kalivas PW (2011) Heroin relapse requires long-term  
758 potentiation-like plasticity mediated by NMDA2b-containing receptors *Proc Natl Acad Sci*  
759 *U S A* 108:19407-19412 doi:10.1073/pnas.1112052108
- 760 Shen HW, Scofield MD, Boger H, Hensley M, Kalivas PW (2014) Synaptic glutamate spillover  
761 due to impaired glutamate uptake mediates heroin relapse *J Neurosci* 34:5649-5657  
762 doi:10.1523/JNEUROSCI.4564-13.2014
- 763 Shiflett MW, Balleine BW (2011) Molecular substrates of action control in cortico-striatal circuits  
764 *Prog Neurobiol* 95:1-13 doi:10.1016/j.pneurobio.2011.05.007
- 765 Siahposht-Khachaki A, Fatahi Z, Yans A, Khodagholi F, Haghparast A (2017) Involvement of  
766 AMPA/Kainate Glutamate Receptor in the Extinction and Reinstatement of Morphine-  
767 Induced Conditioned Place Preference: A Behavioral and Molecular Study *Cell Mol*  
768 *Neurobiol* 37:315-328 doi:10.1007/s10571-016-0371-2
- 769 Smith RJ, Lobo MK, Spencer S, Kalivas PW (2013) Cocaine-induced adaptations in D1 and D2  
770 accumbens projection neurons (a dichotomy not necessarily synonymous with direct and  
771 indirect pathways) *Curr Opin Neurobiol* 23:546-552 doi:10.1016/j.conb.2013.01.026
- 772 Suska A, Lee BR, Huang YH, Dong Y, Schluter OM (2013) Selective presynaptic enhancement  
773 of the prefrontal cortex to nucleus accumbens pathway by cocaine *Proc Natl Acad Sci U*  
774 *S A* 110:713-718 doi:10.1073/pnas.1206287110

- 775 Svingos AL, Moriwaki A, Wang JB, Uhl GR, Pickel VM (1997) mu-Opioid receptors are localized  
776 to extrasynaptic plasma membranes of GABAergic neurons and their targets in the rat  
777 nucleus accumbens *J Neurosci* 17:2585-2594
- 778 Terrier J, Luscher C, Pascoli V (2016) Cell-Type Specific Insertion of GluA2-Lacking AMPARs  
779 with Cocaine Exposure Leading to Sensitization, Cue-Induced Seeking, and Incubation  
780 of Craving *Neuropsychopharmacology* 41:1779-1789 doi:10.1038/npp.2015.345
- 781 Thomas MJ, Beurrier C, Bonci A, Malenka RC (2001) Long-term depression in the nucleus  
782 accumbens: a neural correlate of behavioral sensitization to cocaine *Nat Neurosci*  
783 4:1217-1223 doi:10.1038/nn757
- 784 Trantham-Davidson H, LaLumiere RT, Reissner KJ, Kalivas PW, Knackstedt LA (2012)  
785 Ceftriaxone normalizes nucleus accumbens synaptic transmission, glutamate transport,  
786 and export following cocaine self-administration and extinction training *J Neurosci*  
787 32:12406-12410 doi:10.1523/JNEUROSCI.1976-12.2012
- 788 Turrigiano GG (2008) The self-tuning neuron: synaptic scaling of excitatory synapses *Cell*  
789 135:422-435 doi:10.1016/j.cell.2008.10.008
- 790 van der Laan JW, de Groot G (1988) Changes in locomotor-activity patterns as a measure of  
791 spontaneous morphine withdrawal: no effect of clonidine *Drug Alcohol Depend* 22:133-  
792 140
- 793 van der Laan JW, van 't Land CJ, Loeber JG, de Groot G (1991) Validation of spontaneous  
794 morphine withdrawal symptoms in rats *Arch Int Pharmacodyn Ther* 311:32-45
- 795 van Ree JM, Gerrits MA, Vanderschuren LJ (1999) Opioids, reward and addiction: An encounter  
796 of biology, psychology, and medicine *Pharmacol Rev* 51:341-396
- 797 Vekovischeva OY et al. (2001) Morphine-induced dependence and sensitization are altered in  
798 mice deficient in AMPA-type glutamate receptor-A subunits *J Neurosci* 21:4451-4459
- 799 Voorn P, Vanderschuren LJ, Groenewegen HJ, Robbins TW, Pennartz CM (2004) Putting a  
800 spin on the dorsal-ventral divide of the striatum *Trends Neurosci* 27:468-474  
801 doi:10.1016/j.tins.2004.06.006
- 802 Wang Q, Li D, Bubula N, Campioni MR, McGehee DS, Vezina P (2017) Sensitizing exposure to  
803 amphetamine increases AMPA receptor phosphorylation without increasing cell surface  
804 expression in the rat nucleus accumbens *Neuropharmacology* 117:328-337  
805 doi:10.1016/j.neuropharm.2017.02.018
- 806 Wise RA (1989) Opiate reward: sites and substrates *Neurosci Biobehav Rev* 13:129-133
- 807 Wydeven N et al. (2014) Mechanisms underlying the activation of G-protein-gated inwardly  
808 rectifying K<sup>+</sup> (GIRK) channels by the novel anxiolytic drug, ML297 *Proc Natl Acad Sci U*  
809 *S A* 111:10755-10760 doi:10.1073/pnas.1405190111
- 810 Yoon BJ, Smith GB, Heynen AJ, Neve RL, Bear MF (2009) Essential role for a long-term  
811 depression mechanism in ocular dominance plasticity *Proc Natl Acad Sci U S A*  
812 106:9860-9865 doi:10.1073/pnas.0901305106
- 813 Zahm DS, Brog JS (1992) On the significance of subterritories in the "accumbens" part of the rat  
814 ventral striatum *Neuroscience* 50:751-767
- 815 Zhu Y, Wienecke CF, Nachtrab G, Chen X (2016) A thalamic input to the nucleus accumbens  
816 mediates opiate dependence *Nature* 530:219-222 doi:10.1038/nature16954

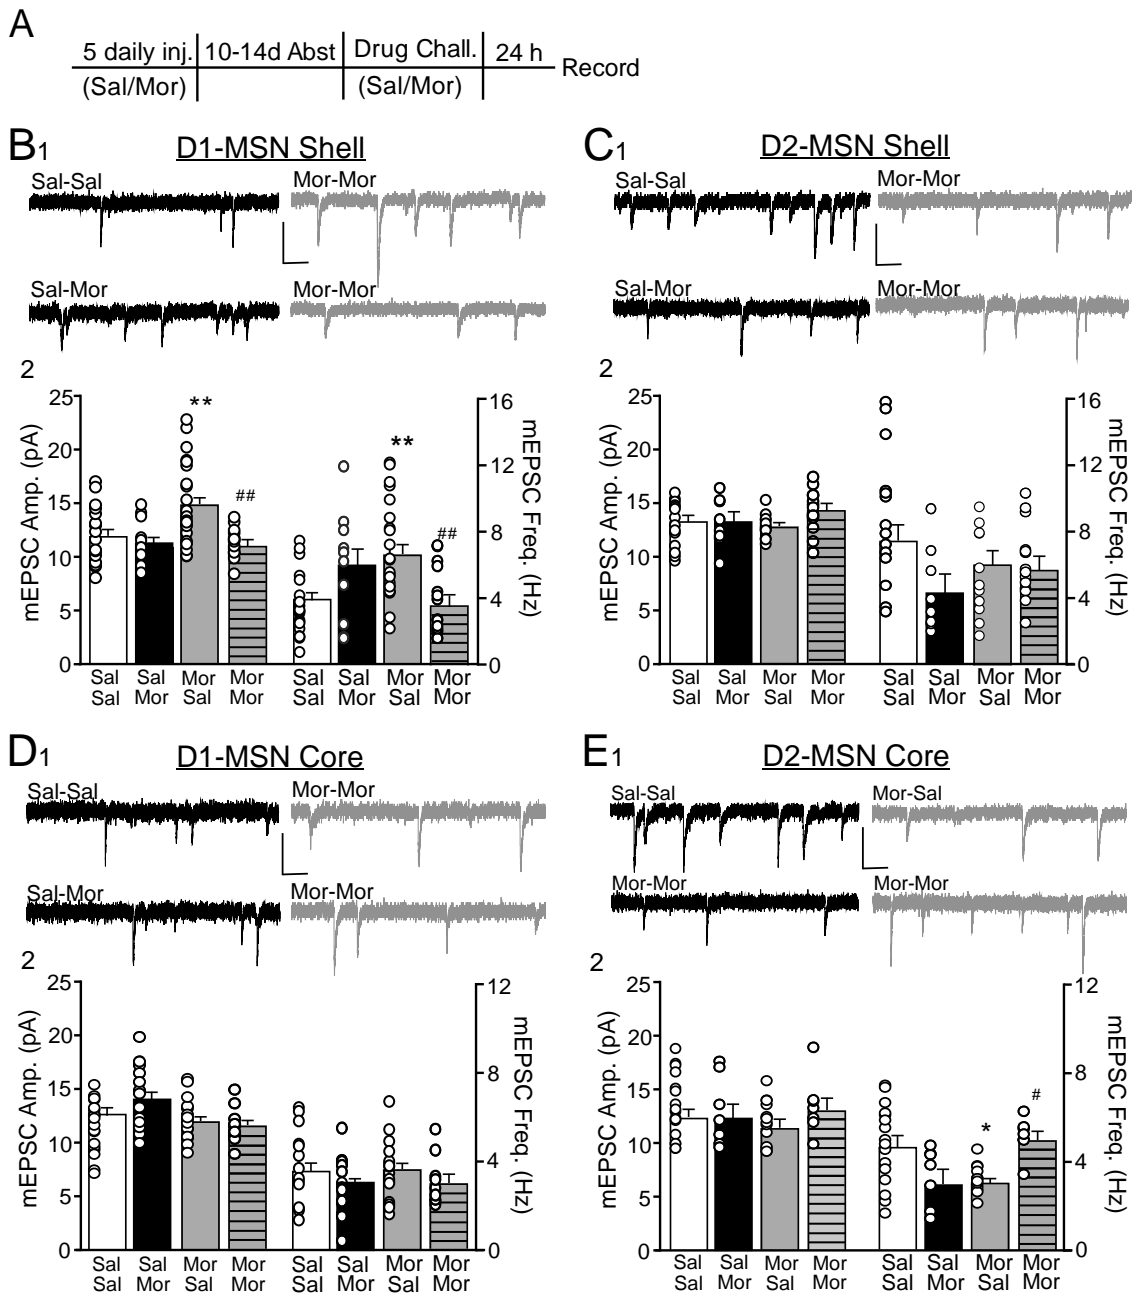

Figure 1. Cell- and region-specific effect of post-abstinence morphine exposure on nucleus accumbens AMPA receptor transmission. **A** Experimental timeline including 5 days of saline or morphine (10 mg/kg; i.p.), a 10-14 day withdrawal period, and challenge injection of saline or morphine. Electrophysiological recordings performed in NAcSh or NAcC D1- or D2-MSNs 24 hours post challenge injection in either coronal or sagittal slices (no significant difference was observed -- see methods). **B** (1) Representative miniature excitatory postsynaptic current (mEPSC) traces and (2) mean mEPSC amplitude (left) and frequency (right) in NAcSh D1-MSNs from saline + saline challenge (Sal-Sal, white; n=20/N=11), saline + morphine challenge (Sal-Mor, black; n=11/N=6), morphine + saline challenge (Mor-Sal, gray; n=22/N=10) and morphine + morphine challenge (Mor-Mor, striped gray; n=15/N=5). **C** (1) Representative traces and (2) mean mEPSCs in NAcSh D2-MSNs [Sal-Sal (n=15/N=8), Sal-Mor (n=8/N=5), Mor-Sal (n=12/N=8), Mor-Mor (n=13/N=7)]. **D** (1) Representative traces and (2) mean mEPSCs in NAcC D1-MSNs [Sal-Sal (n=19/N=11), Sal-Mor (n=12/N=7), Mor-Sal (n=16/N=10), Mor-Mor (n=9/N=7)]. **E** (1) Representative traces and (2) mean mEPSCs in NAcC D2-MSNs [Sal-Sal (n=17/N=11), Sal-Mor (n=7/N=6), Mor-Sal (n=13/N=10), Mor-Mor (n=6/N=5)]. Scale bar = 20 pA/100 ms; Tukey post hoc: \*p<0.05, \*\*p<0.01 vs Sal-Sal, #p<0.05, ##p<0.01 vs Mor-Mor.

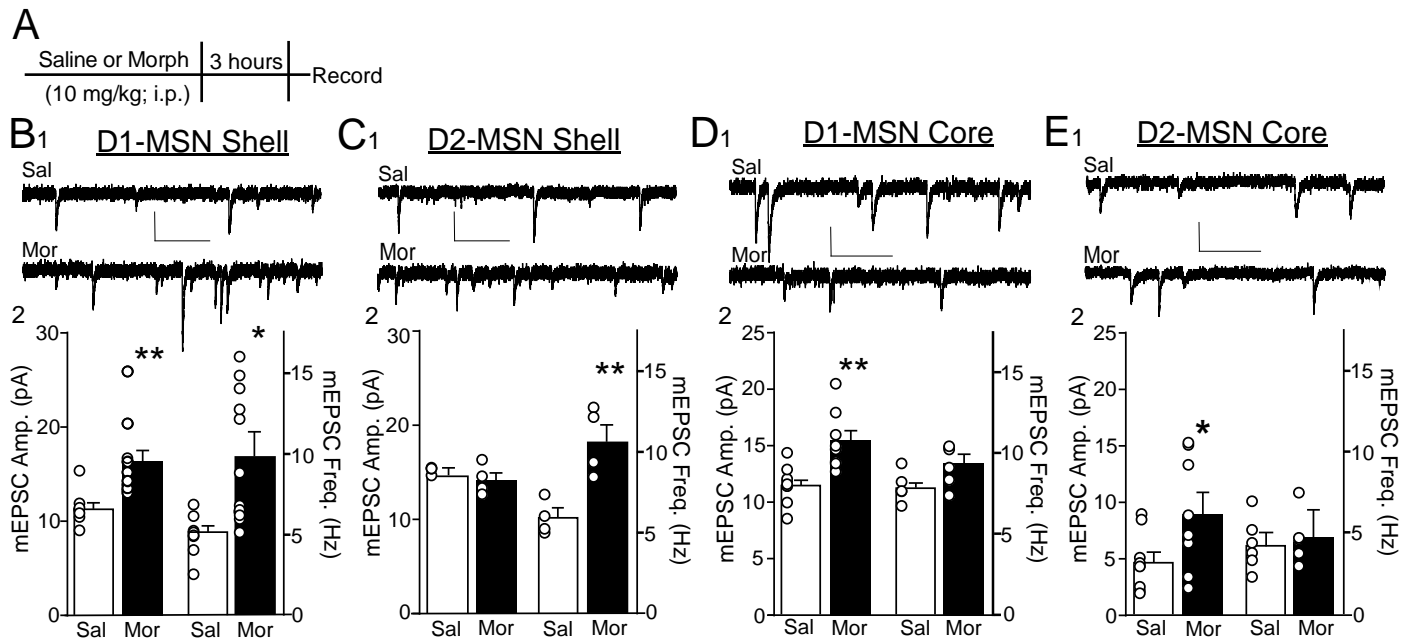

Figure 2. Cell-specific effects of acute morphine on nucleus accumbens AMPA receptor transmission. **A** Experimental timeline including an acute injection of saline or morphine (10 mg/kg; i.p.) and electrophysiological recordings performed 3-4 hours post injection. Recordings were performed in sagittal slices containing the NAc shell or core. **B** (1) Representative AMPAR mEPSC traces and (2) mean mEPSC amplitude (left) and frequency (right) in D1-MSNs from saline (Sal, white; n=8, N=5) and morphine (Mor, black; n=10/N=5) injected mice. **C** (1) Representative traces and (2) mean mEPSCs in NAcSh D2-MSNs (Sal: n=4/N=4; Mor: n=4/N=4). **D** (1) Representative traces and (2) mean mEPSCs in NAcC D1-MSNs (Sal n=9/N=6; Mor: n=8/N=7). **E** (1) Representative mEPSC traces and (2) mean mEPSCs in NAcC D2-MSNs (Sal: n=5, N=5; Mor: n=5/N=4). \*p<0.05, \*\*p<0.01 vs Sal. Scale bars = 20 pA/100 ms.

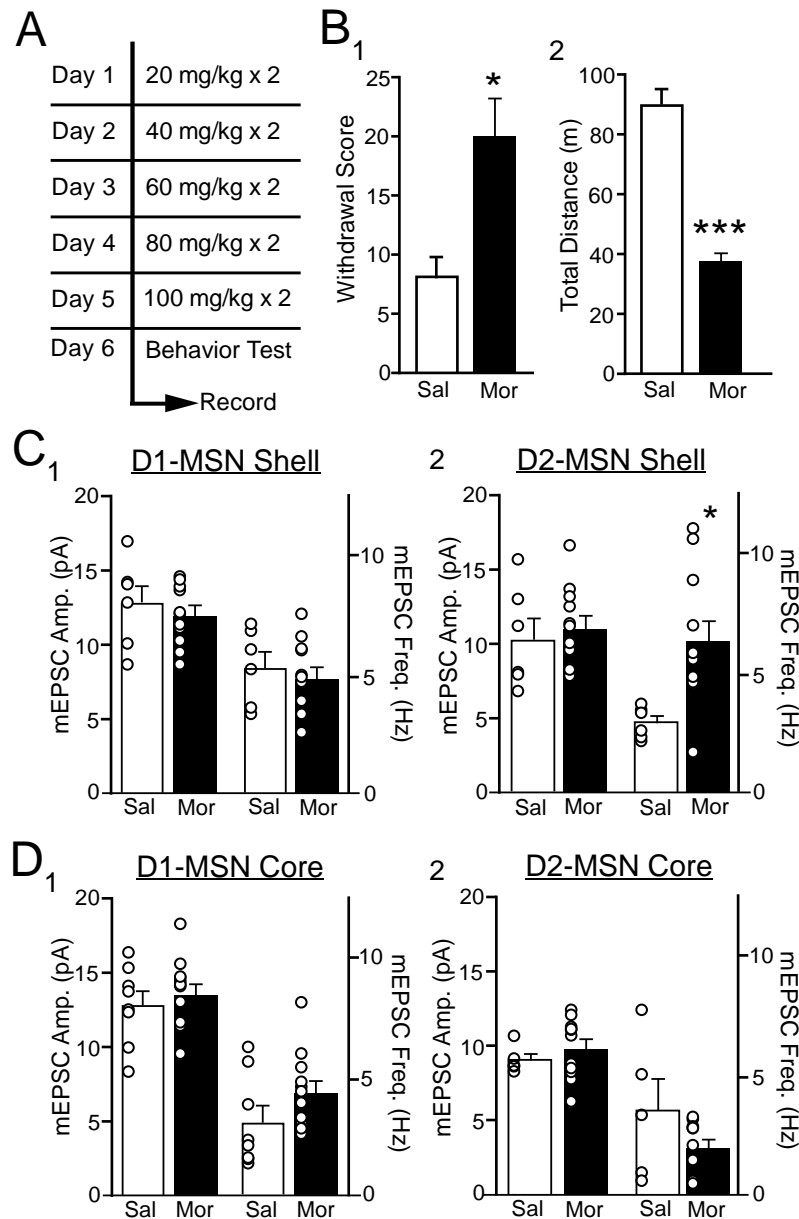

Figure 3. Cell-specific effects of morphine-induced spontaneous acute withdrawal on nucleus accumbens AMPA receptor transmission. **A** Experimental timeline including five twice-daily injections of escalating morphine administration (i.p.) and 24 hours post final injection behavior assessment. Recordings were performed in coronal slices approximately 2 hours following behavior. **B** Mean (1) global withdrawal scores and (2) locomotor activity 24 hours following repeated saline (Sal, white; N=7) or morphine (Mor, black; N=12) injections. **C** Mean mEPSC amplitude (left) and frequency (right) in NAcSh (1) D1-MSNs [Sal (n=6/N=5), Mor (n=11/N=7)] and (2) D2-MSNs [Sal (n=6/N=5), Mor (n=12/N=8)]. **D** Mean mEPSC amplitude and frequency in NAcC (1) D1-MSNs [Sal (n=8/N=7), Mor (n=12/N=9)] and D2-MSNs [Sal (n=5/N=4), Mor (n=11/N=8)]. \* $p < 0.05$ , \*\*\* $p < 0.001$  vs Sal.

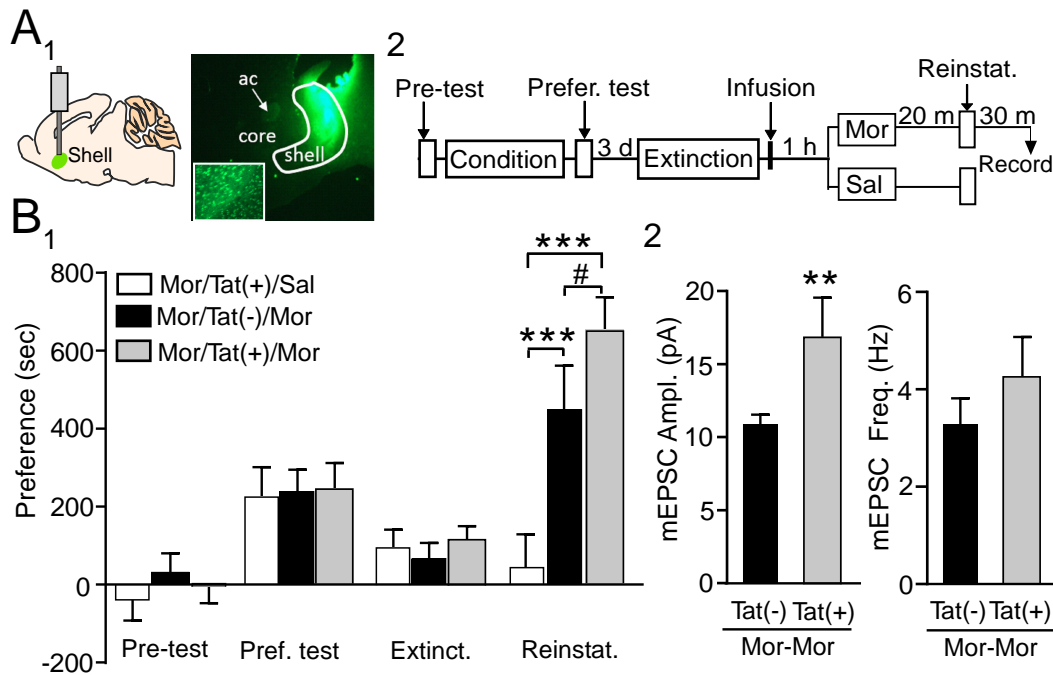

Figure 4. Inhibiting AMPA receptor endocytosis in nucleus accumbens shell increases morphine-induced reinstatement of conditioned place preference. **A** (1) Representative Tat-peptide expression targeted to the NAc shell and (2) experimental timeline of conditioned place preference study including behavioral testing. Electrophysiological recordings were performed in Tat-expressing D1-MSNs from sagittal slices approximately 30 min post reinstatement test. All mice were conditioned with morphine. Following infusion with the active (Tat+) or inactive (Tat-) peptide, mice received a challenge injection of saline (Mor/Tat+/Sal, white), or morphine (Mor/Tat(-)/Mor, black; Mor/Tat(+)/Mor, gray), followed by a test of preference reinstatement 20 min later. **B** (1) Preference scores across test days in mice and (2) mEPSC amplitude (left) and frequency (right) from D1-MSNs expressing fluorescence following testing in a subset of mice receiving morphine injections with the active or inactive peptide.

#p<0.05 Mor/Tat(-)/Mor vs. Mor/Tat(+)/Mor, \*\*\*p<0.001 vs. Mor/Tat+/Sal.
